# Supplementary material for: Population Genomics Reveals Gene Flow and Adaptive Signature in Invasive Weed Mikania micrantha
Source: MDPI journal article supplement (doi:10.3390/genes12081279), 2021-08-20
Supplement: s1 [file s1]

## Supplementary Files

# Population Genomics Reveals Gene Flow and Adaptive Signature in Invasive Weed *Mikania micrantha*

Xiaoxian Ruan <sup>1</sup>, Zhen Wang <sup>1</sup>, Yingjuan Su <sup>1,2,\*</sup> and Ting Wang <sup>3,\*</sup>

<sup>1</sup> School of Life Sciences, Sun Yat-sen University, Guangzhou 510275, China; ruanxx@mail2.sysu.edu.cn (X.R.); wangzh535@mail2.sysu.edu.cn (Z.W.); suyj@mail.sysu.edu.cn (Y.S.)

<sup>2</sup> Research Institute of Sun Yat-sen University in Shenzhen, Shenzhen, 518057, China; suyj@mail.sysu.edu.cn (Y.S.)

<sup>3</sup> College of Life Sciences, South China Agricultural University, Guangzhou 510641, China; tingwang@scau.edu.cn (T.W.)

\* Correspondence: suyj@mail.sysu.edu.cn (Y.S.); tingwang@scau.edu.cn (T.W.); Tel.: +86-020-84111939 (Y.S.); +86-020-85280185 (T.W.)

**Table S1.** Sampling description of 306 *M. micrantha* individuals and soil samples from 21 invasive populations in southern China.

| Region            | Population ID | Longitude      | Latitude      | Individual Number | Soil Sample Number |
|-------------------|---------------|----------------|---------------|-------------------|--------------------|
| Hongkong (HK)     | HK1           | 114°2'33.06"E  | 22°29'21.5"N  | 16                | 3                  |
|                   | HK3           | 114°14'3.02"E  | 22°23'26.21"N | 15                | 3                  |
|                   | HK4           | 114°15'38.21"E | 22°31'36.59"N | 15                | 3                  |
|                   | HK5           | 114°9'10.08"E  | 22°23'49.08"N | 10                | 3                  |
|                   | HK6           | 114°11'48.65"E | 22°15'24.81"N | 15                | 3                  |
|                   | HK7           | 114°8'29.5"E   | 22°27'2.2"N   | 10                | 3                  |
|                   | HK8           | 114°8'3.29"E   | 22°23'11.94"N | 10                | 3                  |
|                   |               |                |               |                   |                    |
| Macao (MA)        | MA1           | 113°33'20.24"E | 22°8'25.31"N  | 15                | 3                  |
|                   | MA4           | 113°33'48.4"E  | 22°7'19.37"N  | 16                | 3                  |
| Shenzhen (SZ)     | SZ1           | 114°03'28.87"E | 22°33'12.96"N | 16                | 3                  |
|                   | SZ4           | 114°02'12.78"E | 22°34'26.71"N | 15                | 3                  |
|                   | SZ5           | 114°10'10.72"E | 22°34'47.98"N | 15                | 3                  |
| Neilingding (NLD) | NLD2          | 113°49'1"E     | 22°24'31.83"N | 15                | 3                  |
|                   | NLD3          | 113°48'13.63"E | 22°24'12.88"N | 16                | 3                  |
|                   | NLD5          | 113°48'0.26"E  | 22°25'13.61"N | 15                | 3                  |
|                   | NLD6          | 113°48'43.34"E | 22°24'55.5"N  | 16                | 3                  |
| Zhuhai (ZH)       | ZH1           | 113°37'51.46"E | 22°25'41.90"N | 15                | 3                  |
|                   | ZH2           | 113°38'14.61"E | 22°24'50.66"N | 16                | 3                  |
| Dongguan (DG)     | DG2           | 113°48'0.17"E  | 22°52'45.75"N | 15                | 3                  |
|                   | DG3           | 113°46'5.33"E  | 22°54'17.22"N | 15                | 3                  |
|                   | DG4           | 113°47'33.93"E | 22°51'15.33"N | 15                | 3                  |

**Table S8.** Summary of transition and transversion mutations of single nucleotide polymorphisms (SNPs) identified across 306 *M. micrantha* individuals.

| Transition/Transversion mutation model | SNP number |
|----------------------------------------|------------|
| Mutation between bases A and G         | 5051       |
| Mutation between bases C and T         | 5156       |
| Mutation between bases A and C         | 1808       |
| Mutation between bases A and T         | 2008       |
| Mutation between bases T and G         | 1832       |
| Mutation between bases C and G         | 1089       |

**Table S9.** The locations and mutation types of SNPs in the *M. micrantha* genome.

| Category            | Number of SNPs |
|---------------------|----------------|
| Upstream            | 312            |
| Downstream          | 316            |
| Upstream/Downstream | 21             |
| Intronic            | 1448           |
| Splicing            | 6              |
| Intergenic          | 13,984         |
| 5'-UTR              | 62             |
| 3'-UTR              | 81             |
| Synonymous          | 402            |
| Nonsynonymous       | 305            |
| unknown             | 4              |
| Other               | 3              |

Upstream: SNP is located in the 1000 bp region upstream of the gene; Downstream: SNP is located in the 1000 bp region downstream of the gene; Upstream/Downstream: SNP is located in the 1000 bp region upstream of the gene and also in the 1000 bp region downstream of another gene; Intergenic: SNPs are located in intergenic regions; Intronic: SNPs are located in intronic regions; Splicing: SNPs are located at the splice site; 5'-UTR: SNPs are located in 5' untranslated regions; 3'-UTR: SNPs are located in 3' untranslated regions; Synonymous: synonymous amino acid substitution; Nonsynonymous: nonsynonymous amino acid substitution.

**Table S10.** The analysis results of the differences in genetic diversity parameters among the six regions obtained from Kruskal-Wallis and post hoc Nemenyi test.

| Genetic parameters                  | Degrees of freedom | Chi-squared | <i>p</i> -value |
|-------------------------------------|--------------------|-------------|-----------------|
| Allelic richness ( $A_R$ )          | 5                  | 9.750       | 0.083           |
| Observed heterozygosity ( $H_o$ )   | 5                  | 5.727       | 0.334           |
| Gene diversity ( $H_s$ )            | 5                  | 5.220       | 0.390           |
| Inbreeding coefficient ( $F_{IS}$ ) | 5                  | 3.185       | 0.672           |

**Table S11.** Genetic differentiation and gene flow between pairwise populations for *M. micrantha*. The lower triangle represents genetic differentiation values ( $F_{ST}$ ), and the upper triangle represents gene flow between pairwise populations.

| Population | HK1   | HK3   | HK4   | HK5   | HK6   | HK7   | HK8    | SZ1    | SZ4   | SZ5    | DG2    | DG3    | DG4    | NLD2  | NLD3   | NLD5  | NLD6   | ZH1    | ZH2    | MA1   | MA4   |
|------------|-------|-------|-------|-------|-------|-------|--------|--------|-------|--------|--------|--------|--------|-------|--------|-------|--------|--------|--------|-------|-------|
| HK1        | -     | 3.426 | 4.38  | 8.083 | 2.875 | 10.62 | 6.893  | 15.375 | 8.083 | 14.456 | 13.639 | 22.477 | 14.456 | 4.295 | 4.467  | 6.329 | 5.848  | 5.702  | 8.679  | 3.656 | 6.893 |
| HK3        | 0.068 | -     | 4.852 | 5.432 | 1.943 | 3.987 | 5.432  | 3.596  | 2.836 | 3.782  | 3.917  | 4.295  | 2.762  | 1.63  | 1.962  | 2.438 | 2.225  | 2.497  | 3.083  | 1.905 | 2.467 |
| HK4        | 0.054 | 0.049 | -     | 5.306 | 2.086 | 4.958 | 4.214  | 5.702  | 3.271 | 4.652  | 6.507  | 5.185  | 4.214  | 2.354 | 2.327  | 3.039 | 3.271  | 3.373  | 4.136  | 2.25  | 3.373 |
| HK5        | 0.03  | 0.044 | 0.045 | -     | 2.875 | 9.75  | 14.456 | 7.563  | 6.694 | 10.167 | 10.167 | 7.563  | 5.702  | 2.799 | 2.691  | 3.538 | 3.848  | 3.538  | 4.38   | 2.201 | 3.321 |
| HK6        | 0.08  | 0.114 | 0.107 | 0.08  | -     | 2.591 | 2.875  | 3.426  | 3.481 | 2.657  | 3.596  | 2.691  | 2.762  | 3.128 | 3.128  | 4.214 | 4.136  | 3.596  | 3.656  | 2.177 | 2.624 |
| HK7        | 0.023 | 0.059 | 0.048 | 0.025 | 0.088 | -     | 7.103  | 7.326  | 6.694 | 10.62  | 9.365  | 9.009  | 8.083  | 2.762 | 3.222  | 4.295 | 3.656  | 3.917  | 5.564  | 2.875 | 3.538 |
| HK8        | 0.035 | 0.044 | 0.056 | 0.017 | 0.08  | 0.034 | -      | 9.365  | 4.852 | 9.009  | 8.371  | 7.326  | 5.564  | 2.799 | 2.657  | 3.782 | 3.596  | 3.718  | 4.75   | 2.528 | 3.271 |
| SZ1        | 0.016 | 0.065 | 0.042 | 0.032 | 0.068 | 0.033 | 0.026  | -      | 9.75  | 12.25  | 49.75  | 12.908 | 15.375 | 4.852 | 4.06   | 5.432 | 6.893  | 6.694  | 7.326  | 3.222 | 5.848 |
| SZ4        | 0.03  | 0.081 | 0.071 | 0.036 | 0.067 | 0.036 | 0.049  | 0.025  | -     | 6      | 8.371  | 6.329  | 7.563  | 3.083 | 3.175  | 4.295 | 4.467  | 4.467  | 4.467  | 2.41  | 4.295 |
| SZ5        | 0.017 | 0.062 | 0.051 | 0.024 | 0.086 | 0.023 | 0.027  | 0.02   | 0.04  | -      | 12.908 | 9.009  | 8.083  | 2.915 | 2.997  | 4.214 | 3.596  | 4.295  | 5.306  | 2.997 | 3.373 |
| DG2        | 0.018 | 0.06  | 0.037 | 0.024 | 0.065 | 0.026 | 0.029  | 0.005  | 0.029 | 0.019  | -      | 12.908 | 12.908 | 4.958 | 4.558  | 6.694 | 8.083  | 6.329  | 8.679  | 3.271 | 5.702 |
| DG3        | 0.011 | 0.055 | 0.046 | 0.032 | 0.085 | 0.027 | 0.033  | 0.019  | 0.038 | 0.027  | 0.019  | -      | 15.375 | 3.656 | 3.917  | 6.16  | 5.185  | 5.848  | 7.326  | 3.481 | 6     |
| DG4        | 0.017 | 0.083 | 0.056 | 0.042 | 0.083 | 0.03  | 0.043  | 0.016  | 0.032 | 0.03   | 0.019  | 0.016  | -      | 4.295 | 4.136  | 5.564 | 5.306  | 4.958  | 6.694  | 3.538 | 5.564 |
| NLD2       | 0.055 | 0.133 | 0.096 | 0.082 | 0.074 | 0.083 | 0.082  | 0.049  | 0.075 | 0.079  | 0.048  | 0.064  | 0.055  | -     | 17.607 | 7.103 | 62.25  | 8.083  | 9.365  | 2.836 | 4.558 |
| NLD3       | 0.053 | 0.113 | 0.097 | 0.085 | 0.074 | 0.072 | 0.086  | 0.058  | 0.073 | 0.077  | 0.052  | 0.06   | 0.057  | 0.014 | -      | 6.507 | 18.981 | 6      | 10.167 | 3.039 | 5.069 |
| NLD5       | 0.038 | 0.093 | 0.076 | 0.066 | 0.056 | 0.055 | 0.062  | 0.044  | 0.055 | 0.056  | 0.036  | 0.039  | 0.043  | 0.034 | 0.037  | -     | 10.62  | 9.009  | 17.607 | 3.782 | 6     |
| NLD6       | 0.041 | 0.101 | 0.071 | 0.061 | 0.057 | 0.064 | 0.065  | 0.035  | 0.053 | 0.065  | 0.03   | 0.046  | 0.045  | 0.004 | 0.013  | 0.023 | -      | 13.639 | 31     | 3.987 | 8.083 |
| ZH1        | 0.042 | 0.091 | 0.069 | 0.066 | 0.065 | 0.06  | 0.063  | 0.036  | 0.053 | 0.055  | 0.038  | 0.041  | 0.048  | 0.03  | 0.04   | 0.027 | 0.018  | -      | 16.417 | 3.917 | 6.16  |
| ZH2        | 0.028 | 0.075 | 0.057 | 0.054 | 0.064 | 0.043 | 0.05   | 0.033  | 0.053 | 0.045  | 0.028  | 0.033  | 0.036  | 0.026 | 0.024  | 0.014 | 0.008  | 0.015  | -      | 5.306 | 8.679 |
| MA1        | 0.064 | 0.116 | 0.1   | 0.102 | 0.103 | 0.08  | 0.09   | 0.072  | 0.094 | 0.077  | 0.071  | 0.067  | 0.066  | 0.081 | 0.076  | 0.062 | 0.059  | 0.06   | 0.045  | -     | 2.836 |
| MA4        | 0.035 | 0.092 | 0.069 | 0.07  | 0.087 | 0.066 | 0.071  | 0.041  | 0.055 | 0.069  | 0.042  | 0.04   | 0.043  | 0.052 | 0.047  | 0.04  | 0.03   | 0.039  | 0.028  | 0.081 | -     |

**Table S12.** Genetic differentiation and gene flow between pairwise regions for *M. micrantha*. The lower triangle represents genetic differentiation values ( $F_{ST}$ ), and the upper triangle represents gene flow between pairwise regions.

| Region | HK    | SZ     | DG     | NLD   | ZH     | MA     |
|--------|-------|--------|--------|-------|--------|--------|
| HK     | -     | 20.583 | 18.981 | 6     | 8.679  | 7.103  |
| SZ     | 0.012 | -      | 31     | 5.564 | 7.563  | 6.507  |
| DG     | 0.013 | 0.008  | -      | 6.893 | 9.009  | 9.009  |
| NLD    | 0.04  | 0.043  | 0.035  | -     | 22.477 | 9.009  |
| ZH     | 0.028 | 0.032  | 0.027  | 0.011 | -      | 14.456 |
| MA     | 0.034 | 0.037  | 0.027  | 0.027 | 0.017  | -      |

**Table S13.** Molecular variance analysis (AMOVA) of *M. micrantha*.

| Source of variation                                   | d.f. | Sum of squares | Variance components | Percentage of variation |
|-------------------------------------------------------|------|----------------|---------------------|-------------------------|
| Among populations                                     | 20   | 37176.946      | 35.624              | 4.16%                   |
| Within populations                                    | 591  | 485538.029     | 821.553             | 95.84%                  |
| Total                                                 | 611  | 522714.975     | 857.178             | 100%                    |
| Fixation Index ( $F_{ST}$ ): 0.042 $p$ -value < 0.001 |      |                |                     |                         |

d.f., degrees of freedom.

**Table S16.** Outlier SNPs associated with environmental variables identified using LFMM.

| Chromosome | Position  | Environmental variables |       |       |     |
|------------|-----------|-------------------------|-------|-------|-----|
| Hic_asm_1  | 56244207  | Bio12                   | Bio18 |       |     |
| Hic_asm_2  | 64422982  | Bio12                   | C     | Cr    | PNV |
| Hic_asm_2  | 73718621  | Bio12                   | Bio18 |       |     |
| Hic_asm_3  | 29391298  | Bio18                   |       |       |     |
| Hic_asm_6  | 5664974   | Bio12                   |       |       |     |
| Hic_asm_6  | 42111491  | Bio18                   |       |       |     |
| Hic_asm_6  | 79396270  | PNV                     |       |       |     |
| Hic_asm_7  | 44788339  | C                       |       |       |     |
| Hic_asm_8  | 1788483   | Bio12                   | C     |       |     |
| Hic_asm_9  | 35305573  | C                       |       |       |     |
| Hic_asm_10 | 141801782 | Bio12                   | Bio18 |       |     |
| Hic_asm_13 | 8640322   | Bio18                   | Cr    | Bio12 |     |
| Hic_asm_13 | 95869816  | Bio12                   | C     | PNV   |     |
| Hic_asm_14 | 3269220   | Bio12                   |       |       |     |
| Hic_asm_14 | 56405021  | C                       |       |       |     |
| Hic_asm_16 | 11549940  | Bio18                   | PNV   | Bio12 |     |
| Hic_asm_16 | 54017721  | Bio12                   |       |       |     |
| Hic_asm_16 | 65069126  | K                       |       |       |     |

Bio12, annual precipitation; Bio18, precipitation of warmest quarter; PNV, percent of non-vegetation cover.

**Table S17.** Outlier SNPs associated with environmental variables identified using BAYENV.

| Chromosome | Position | Environmental variables |      |       |    |    |     |  |
|------------|----------|-------------------------|------|-------|----|----|-----|--|
| Hic_asm_2  | 59705425 | Bio3                    | Bio9 | Bio14 |    |    |     |  |
| Hic_asm_2  | 64422982 | Bio3                    | Bio9 |       |    |    |     |  |
| Hic_asm_2  | 67009047 | PTC                     |      |       |    |    |     |  |
| Hic_asm_2  | 72037757 | Bio3                    | Bio9 | Bio14 | C  |    |     |  |
| Hic_asm_2  | 73123514 | Bio3                    | Bio9 | Bio14 | C  | Si |     |  |
| Hic_asm_2  | 74647226 | Bio3                    | Bio9 | Bio14 |    |    |     |  |
| Hic_asm_3  | 80329031 | Bio3                    | Bio9 | Bio14 | Si |    |     |  |
| Hic_asm_4  | 13971277 | Bio3                    | Bio9 | Bio14 | C  | Si |     |  |
| Hic_asm_4  | 13971324 | Bio3                    | Bio9 | Bio14 | C  | Si |     |  |
| Hic_asm_5  | 38926145 | Ca                      |      |       |    |    |     |  |
| Hic_asm_6  | 45893595 | Bio14                   | C    |       |    |    |     |  |
| Hic_asm_6  | 79396270 | C                       | Ca   |       |    |    |     |  |
| Hic_asm_7  | 42423247 | Bio3                    | Bio9 | Bio14 | C  |    |     |  |
| Hic_asm_8  | 1788483  | C                       |      |       |    |    |     |  |
| Hic_asm_9  | 33697841 | C                       |      |       |    |    |     |  |
| Hic_asm_9  | 35305573 | Bio3                    | Bio9 | Bio14 | C  | Si | PNT |  |
| Hic_asm_10 | 16503156 | Ca                      |      |       |    |    |     |  |
| Hic_asm_10 | 84852364 | C                       | Ca   |       |    |    |     |  |
| Hic_asm_14 | 2443805  | Bio9                    | C    |       |    |    |     |  |
| Hic_asm_14 | 52856134 | Bio3                    | Bio9 | C     |    |    |     |  |
| Hic_asm_15 | 34256787 | Bio3                    | Bio9 | Bio14 | C  | Si |     |  |
| Hic_asm_16 | 29030223 | Bio3                    | Bio9 | Bio14 |    |    |     |  |
| Hic_asm_17 | 13338860 | C                       |      |       |    |    |     |  |
| Hic_asm_17 | 15895453 | Ca                      |      |       |    |    |     |  |

Bio3, isothermality; Bio9, mean temperature of driest quarter; Bio14, precipitation of driest month; PNT, percent of non-tree vegetation cover; PTC, percent of tree cover.

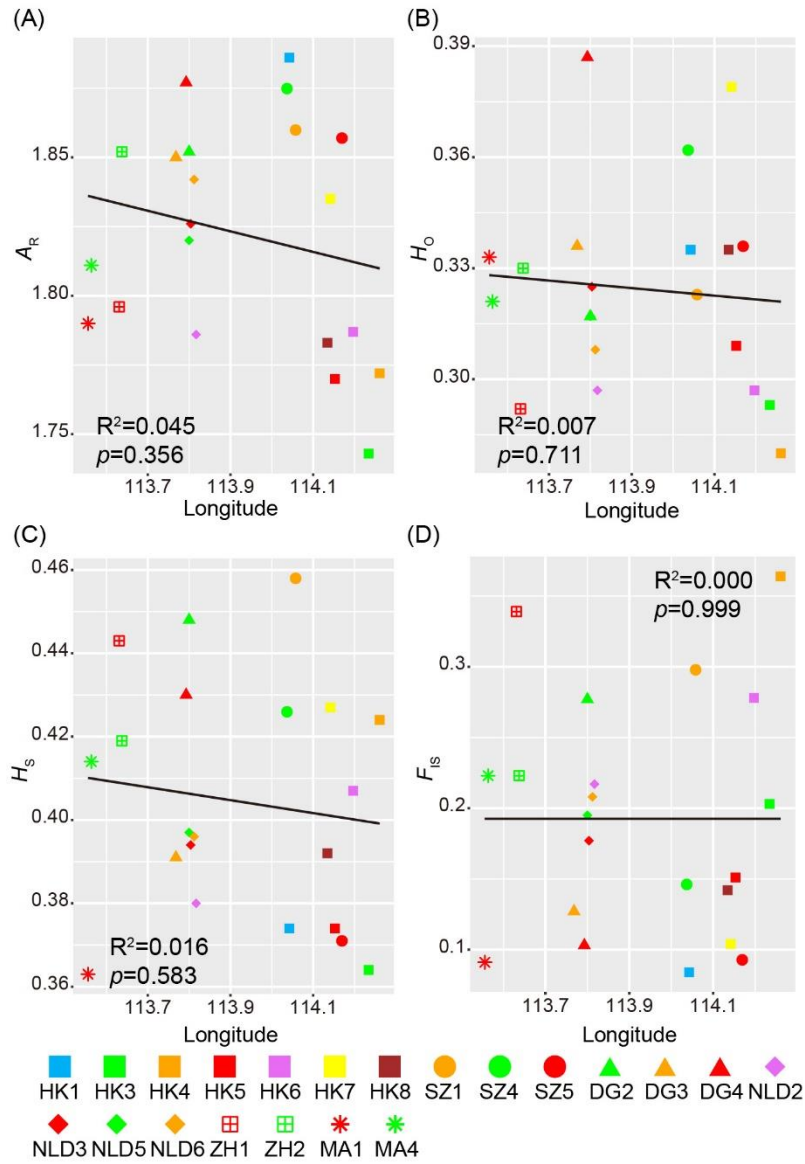

**Figure S1.** Correlation between genetic diversity indices and longitude of sampling populations. Diversity indices included allelic richness ( $A_R$ ), observed heterozygosity ( $H_o$ ), gene diversity ( $H_s$ ), and inbreeding coefficient ( $F_{is}$ ).

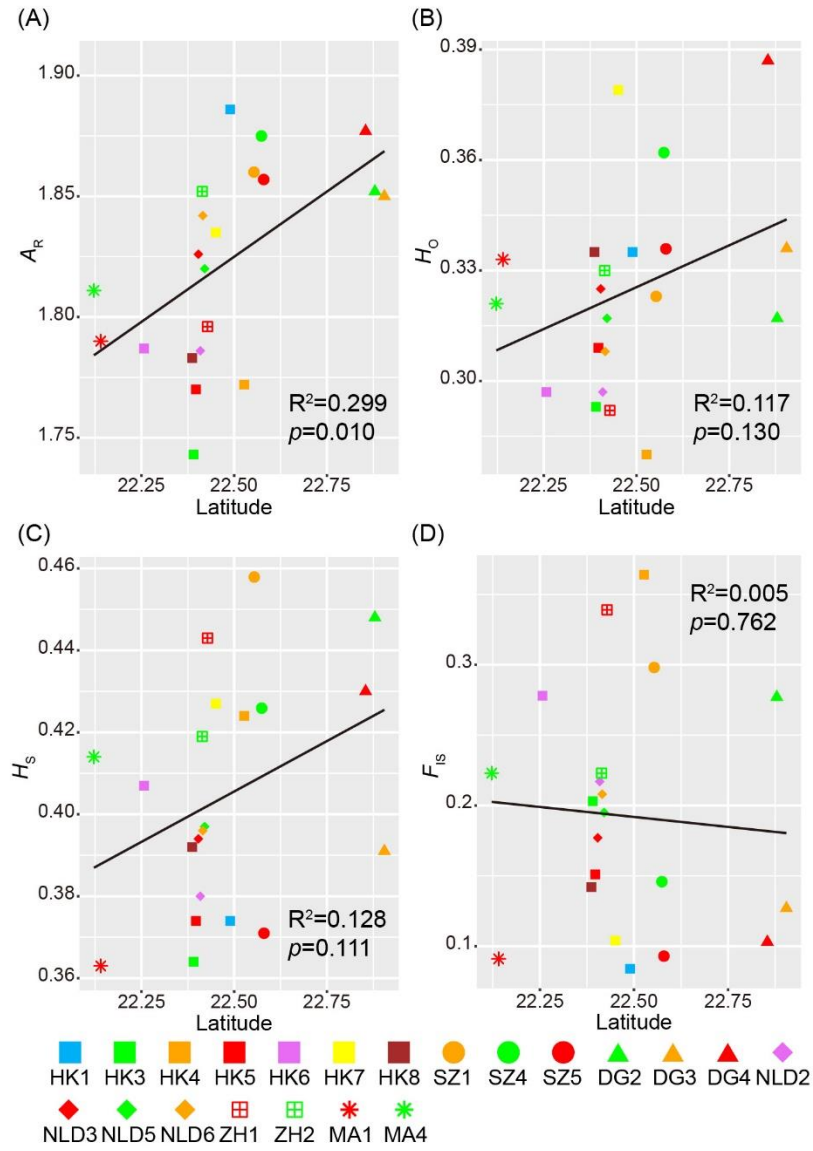

**Figure S2.** Correlation between genetic diversity indices and latitude of sampling populations. Diversity indices included allelic richness ( $A_R$ ), observed heterozygosity ( $H_o$ ), gene diversity ( $H_s$ ), and inbreeding coefficient ( $F_{is}$ ).

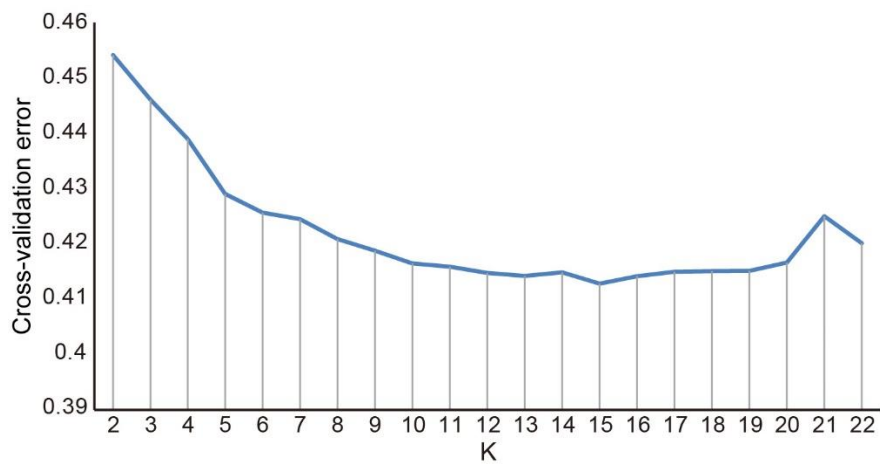

**Figure S3.** The optimum number of clusters ( $K$ ) estimated with ADMIXTURE analysis based on cross-validation (CV) error.

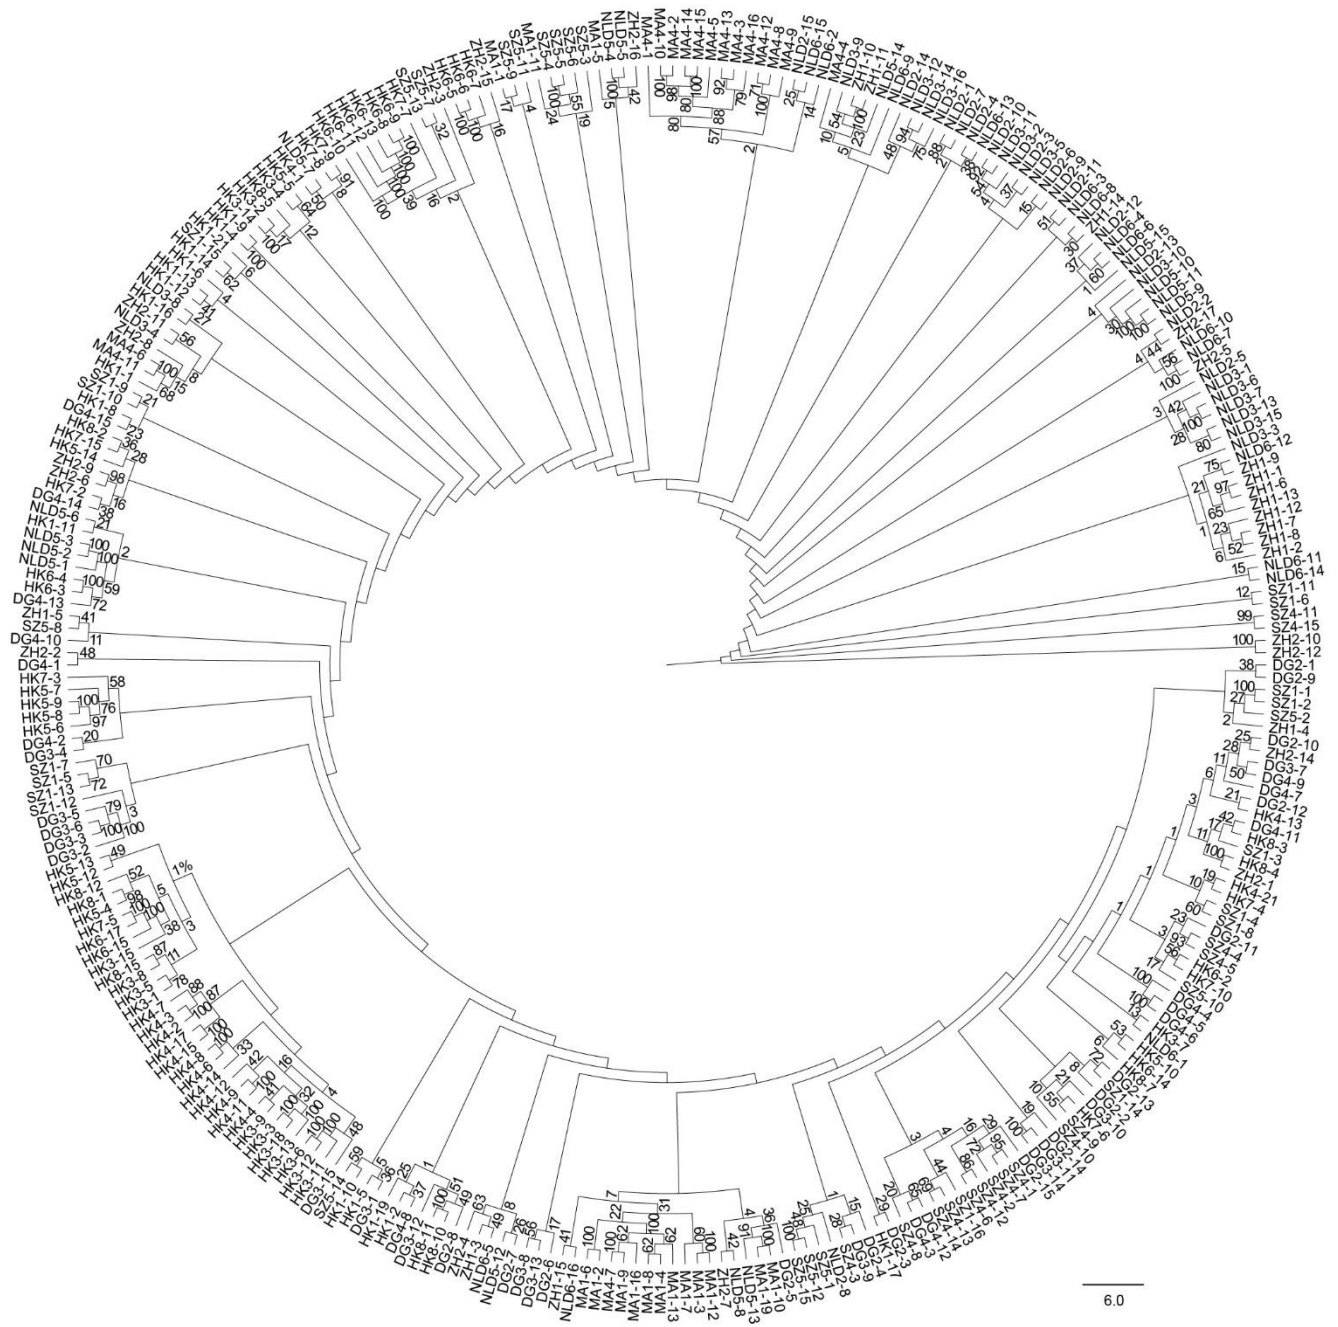

**Figure S4.** Unweight pair group method with arithmetic mean (UPGMA) tree constructed using the pairwise genetic distances among 306 *M. micrantha* individuals.



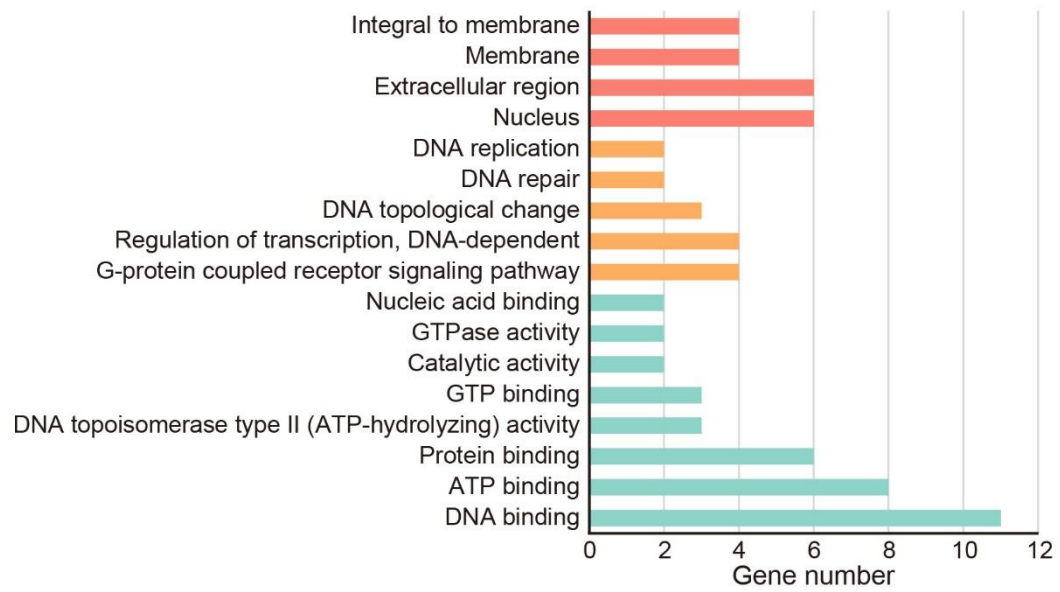

**Figure S5.** Gene ontology (GO) annotation of the positive selection genes in *M. micrantha*. The red, orange, and green bars represent cellular component, biological process, and molecular function categories, respectively.

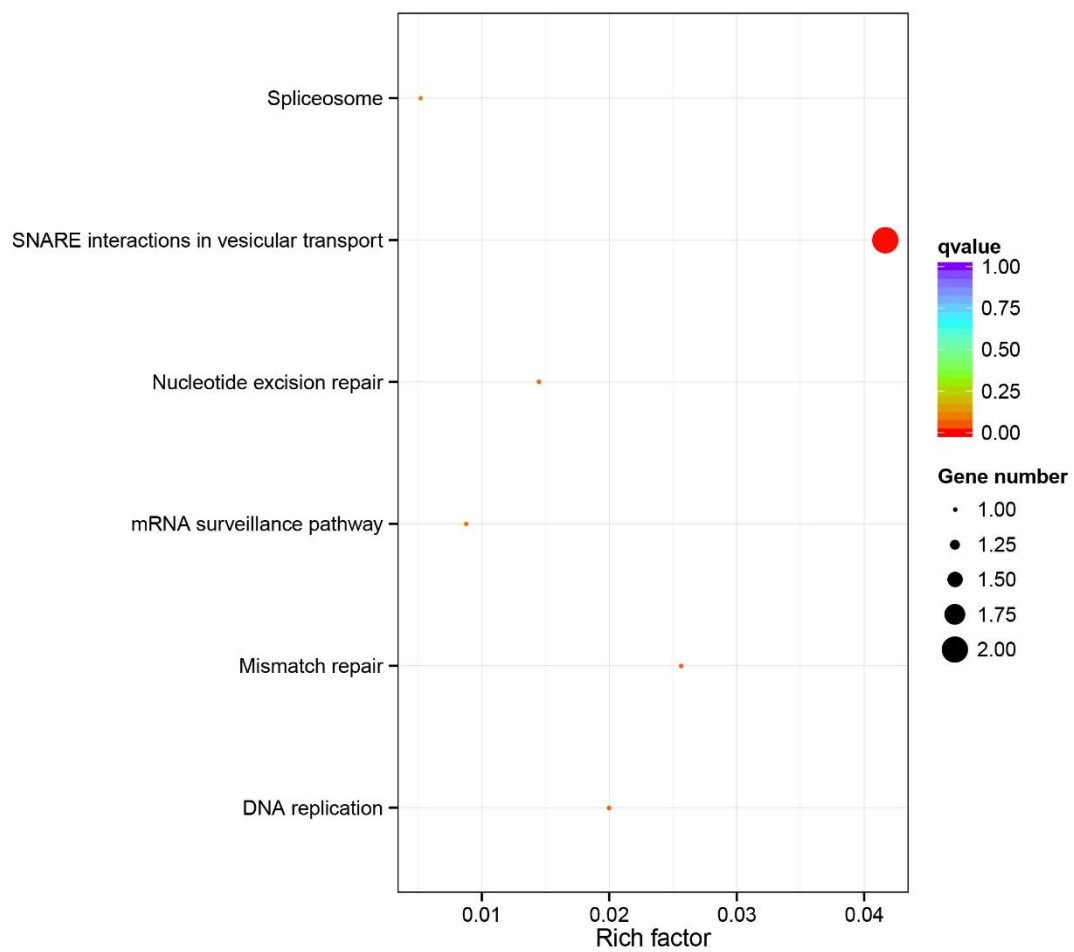

**Figure S6.** Kyoto Encyclopedia of Genes and Genomes (KEGG) pathway enrichment analysis of the positive selection genes in *M. micrantha*.
